# Supplementary material
Source: PubMed Central journal article supplement (PMC4617211)

A

| No.  | Feature                           | Description                                                                                                                 |
|------|-----------------------------------|-----------------------------------------------------------------------------------------------------------------------------|
| i    | <b>NWD Score</b>                  | Primary CompPASS Score: incorporates total spectral counts, frequency of observation, and reproducibility across replicates |
| ii   | <b>Z Score</b>                    | Secondary CompPASS Score: Z-score transformation of a protein's average PSM's compared to its abundance in all other IP's.  |
| iii  | <b>Plate Z Score</b>              | Z-score transformation of a protein's average PSM's compared to its abundance in all other IPs on the same plate.           |
| iv   | <b>Entropy</b>                    | Detects LC carry-over and other inconsistent proteins                                                                       |
| v    | <b>Unique Peptide Bins</b>        | Unique Peptide Count (binned). A single bin is used for 10+ peptides.                                                       |
| vi   | <b>Ratio</b>                      | Fraction of IP's in which a given protein was detected                                                                      |
| vii  | <b>Total PSMs</b>                 | Sum of PSM's observed for a given protein across ALL IP's.                                                                  |
| viii | <b>Ratio Total PSM's</b>          | For a given protein, the ratio of observed PSM's within a single IP to the total PSM's across all IP's.                     |
| ix   | <b>Unique:Total Peptide Ratio</b> | Ratio of unique to total peptide counts.                                                                                    |

B

$$s_E = p_A \log_2(p_A) + p_B \log_2(p_B)$$

$$P_A = \frac{PSM_A + 0.5}{PSM_A + PSM_B + 1.0}$$

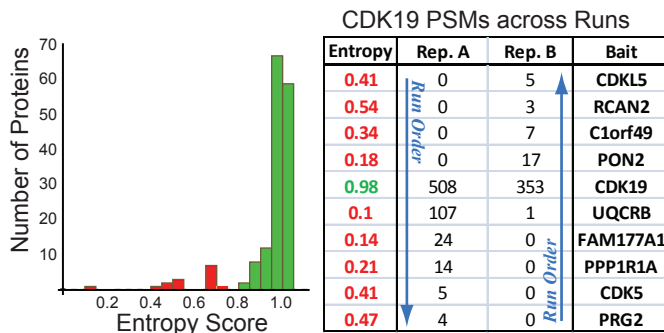

C

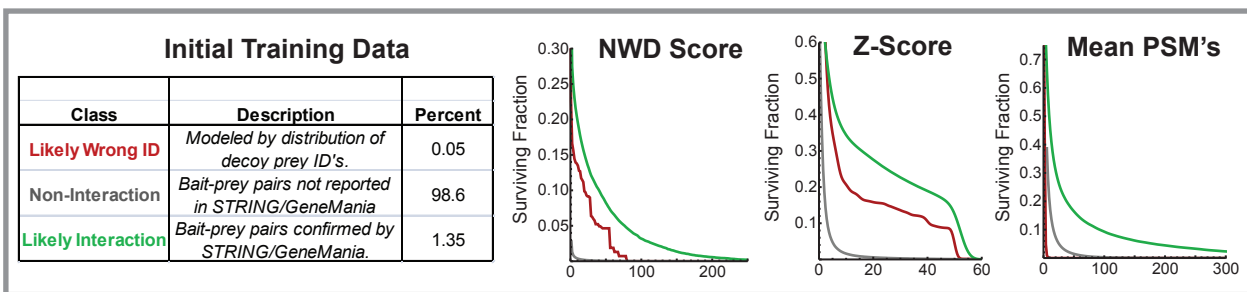

D

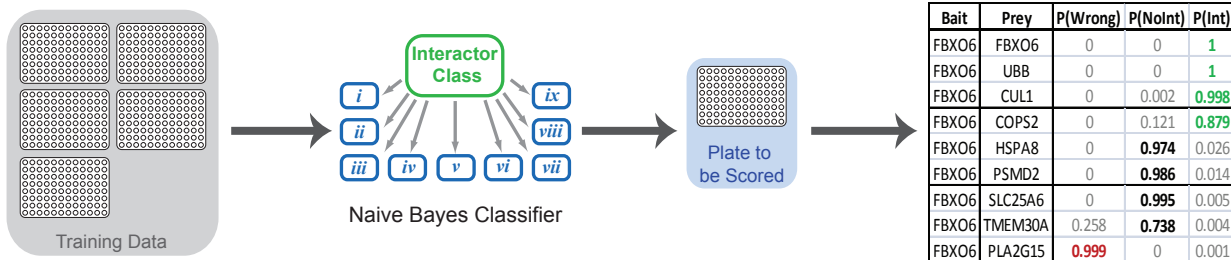

E

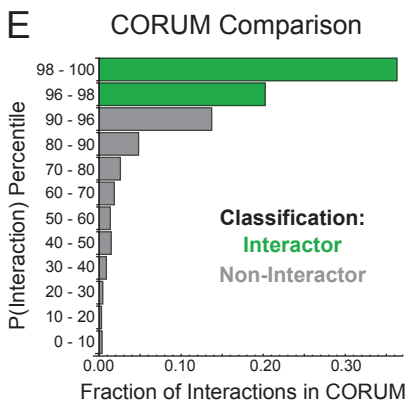

F

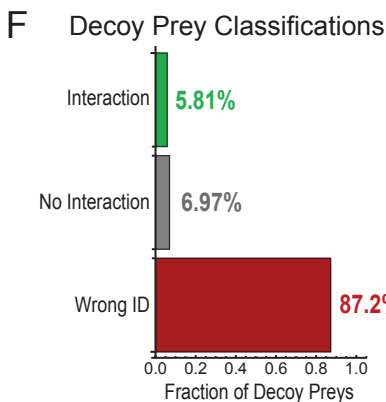

G

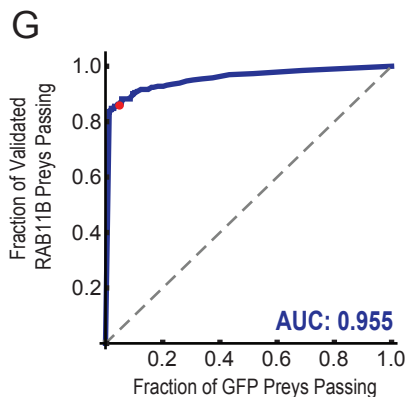

Supplement: NIHMS705373-supplement-2.pdf [file NIHMS705373-supplement-2.pdf]
