# Supplementary material
Source: PubMed Central journal article supplement (PMC4617211)

## A Proteomic Survey of HEK293T Protein Expression

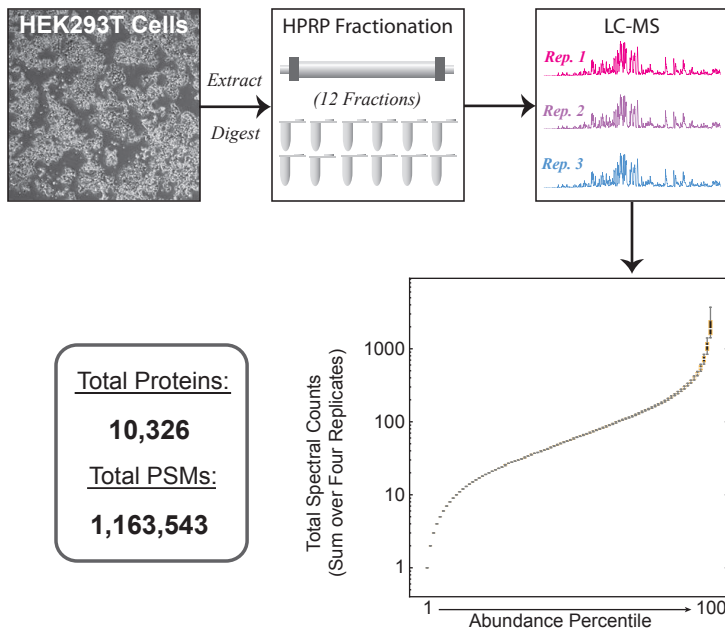

## B Protein Expression in HEK293T Cells

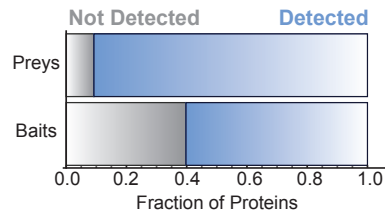

## C HEK293T Abundance Distribution among Bait and Prey Proteins

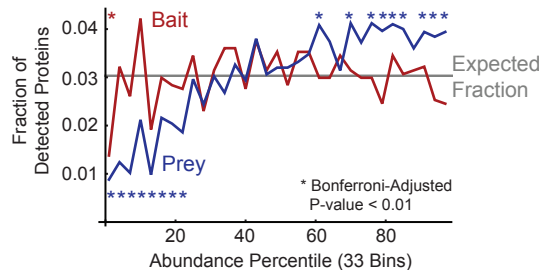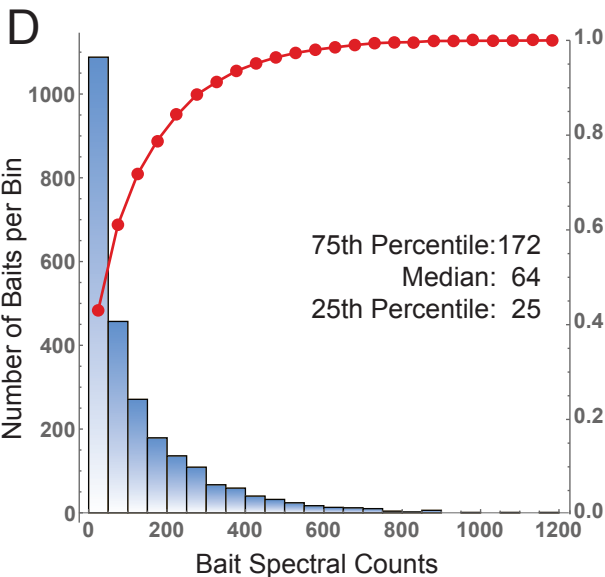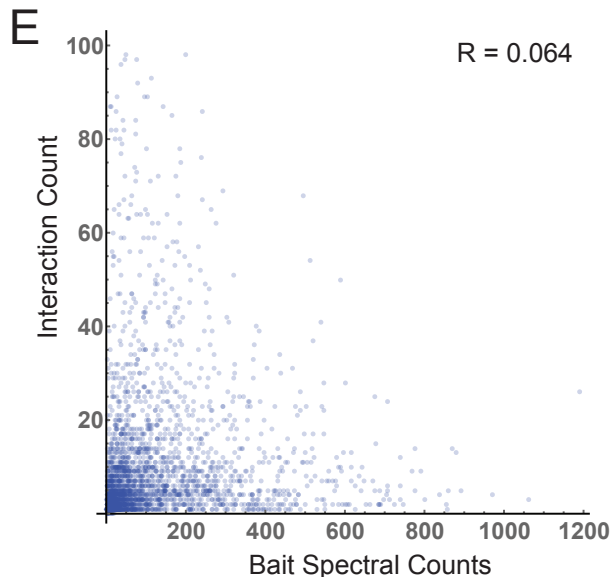

Supplement: NIHMS705373-supplement-4.pdf [file NIHMS705373-supplement-4.pdf]
