# Supplementary material
Source: PubMed Central journal article supplement (PMC4617211)
Supplement: NIHMS705373-supplement-5.pdf [file NIHMS705373-supplement-5.pdf]

A

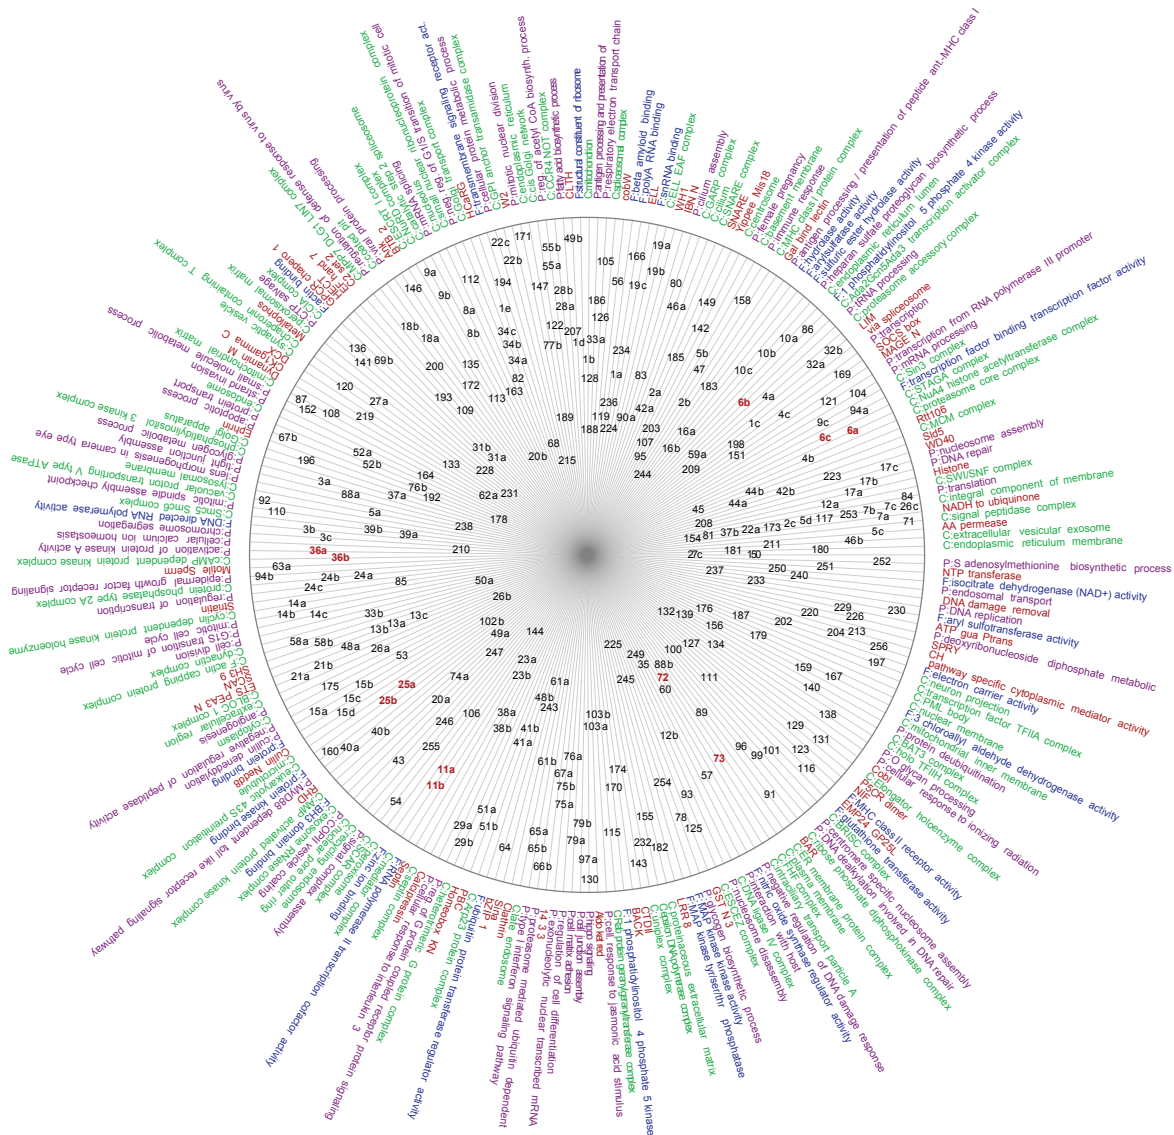

B

|               |                                                                                        |                                                                                                                                                                                      |                                                                                                                                                                                                                                                                                  |
|---------------|----------------------------------------------------------------------------------------|--------------------------------------------------------------------------------------------------------------------------------------------------------------------------------------|----------------------------------------------------------------------------------------------------------------------------------------------------------------------------------------------------------------------------------------------------------------------------------|
| <b>GO MF:</b> |                                                                                        | 11a & 11b: RNA Pol. II Trans. Cofactor Act. ( $<1e^{-25}$ )                                                                                                                          | 36a: cAMP-dependent Protein Kinase Act. ( $4.1e^{-9}$ )<br>36b: cAMP binding ( $1.5e^{-5}$ )<br>36a & 36b: cAMP-dependent Protein Kinase Complex ( $3.1e^{-5}; 2.8e^{-9}$ )<br><b>36a &amp; 36b: Activation of Protein Kinase A Activity (<math>2.7e^{-7}; 1.4e^{-7}</math>)</b> |
| <b>GO CC:</b> | <b>Intraciliary Transport Particle A (<math>3.4e^{-15}</math>)</b>                     | <b>11a &amp; 11b: Mediator Complex (<math>&lt;10e^{-25}</math>)</b>                                                                                                                  |                                                                                                                                                                                                                                                                                  |
| <b>GO BP:</b> | Intraciliary Retrograde Transport ( $3.1e^{-6}$ )                                      | 11a & 11b: Transcription Initiation from RNA Pol. II Promoter ( $<1e^{-25}$ )                                                                                                        |                                                                                                                                                                                                                                                                                  |
| <b>PFAM:</b>  | WD40 ( $4.7e^{-4}$ )                                                                   | 11b: Med13_C ( $1.42e^{-5}$ ); Med13_N ( $1.42e^{-5}$ )                                                                                                                              | 36a & 36b: RIIa ( $2.2e^{-5}; 1.5e^{-5}$ )                                                                                                                                                                                                                                       |
|               | <i>Cluster 72</i><br>                                                                  | <i>Cluster 11a</i> <i>Cluster 11b</i><br>                                                                                                                                            | <i>Cluster 36a</i> <i>Cluster 36b</i><br>                                                                                                                                                                                                                                        |
| <b>GO MF:</b> | 25a & 25b: Translation Initiation Factor Activity ( $6.5e^{-15}; 1.5e^{-12}$ )         | 6a, 6b, 6c: Transcription Coactivator Activity ( $2.0e^{-3}; 5.2e^{-4}; 2.5e^{-3}$ )                                                                                                 | Identical Protein Binding ( $9.2e^{-1}$ )                                                                                                                                                                                                                                        |
| <b>GO CC:</b> | <b>25a &amp; 25b: Eukaryotic 43S Preinitiation Complex (<math>&lt;1e^{-25}</math>)</b> | <b>6a: NUA4 Histone Acetyltransferase Cplx (<math>&lt;1e^{-25}</math>)</b><br><b>6b: Ada2/Gen5/Ada3 Cplx (<math>&lt;1e^{-25}</math>); 6c: STAGA Cplx (<math>&lt;1e^{-25}</math>)</b> | <b>FHF Complex (<math>&lt;1e^{-25}</math>)</b>                                                                                                                                                                                                                                   |
| <b>GO BP:</b> | 25a & 25b: Formation of Translation Pre-initiation Complex ( $<1e^{-25}; 3.4e^{-13}$ ) | 6b, 6c: Histone H3 Acetylation ( $<1e^{-25}; <1e^{-29}$ )<br>6a: Histone H2A Acetylation ( $<1e^{-25}$ ); Histone H4 Acetylation ( $<1e^{-25}$ )                                     | Early to Late Endosome Transport ( $3.1e^{-13}$ )<br>Endosome Organization ( $4.7e^{-9}$ ); Lysosome Organization ( $4.7e^{-9}$ )                                                                                                                                                |
| <b>PFAM:</b>  | 25a & 25b: PCI ( $2.6e^{-6}; 2.4e^{-4}$ )                                              |                                                                                                                                                                                      | HOOK ( $2.8e^{-3}$ )                                                                                                                                                                                                                                                             |
|               | <i>Cluster 25a</i> <i>Cluster 25b</i><br>                                              | <i>Cluster 6c</i><br>                                                                                                                                                                | <i>Cluster 73</i><br>                                                                                                                                                                                                                                                            |
|               |                                                                                        | <i>Cluster 6a</i> <i>Cluster 6b</i>                                                                                                                                                  |                                                                                                                                                                                                                                                                                  |
