# Supplementary material
Source: PubMed Central journal article supplement (PMC4617211)

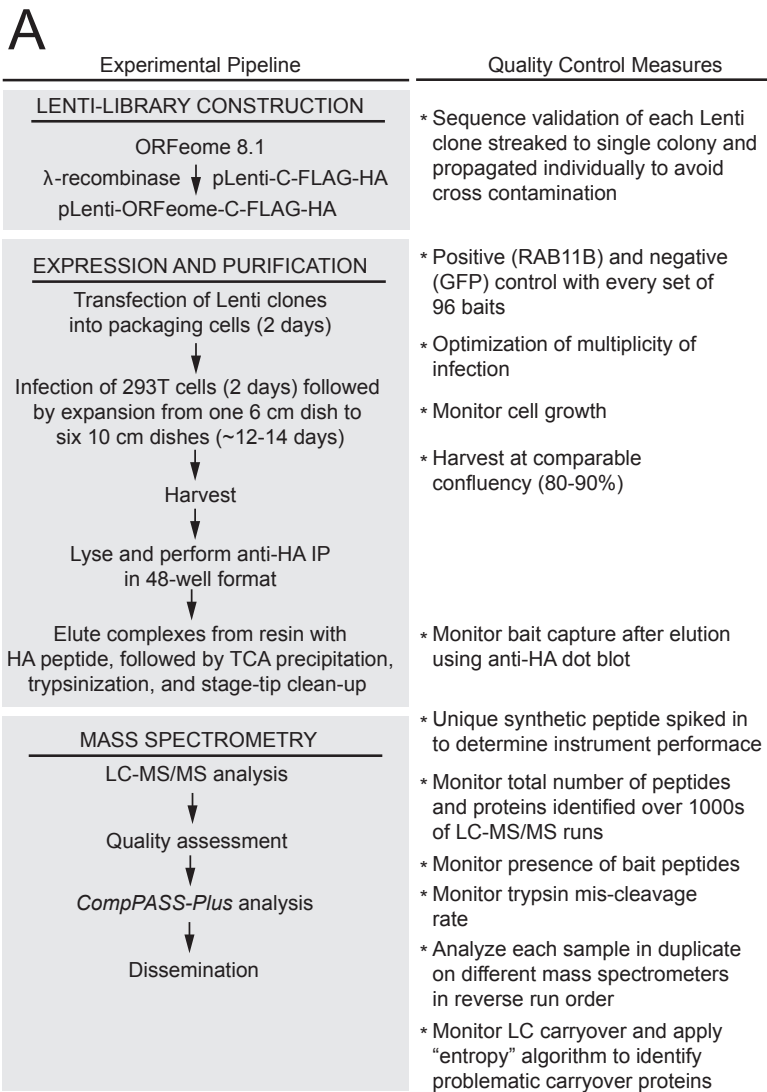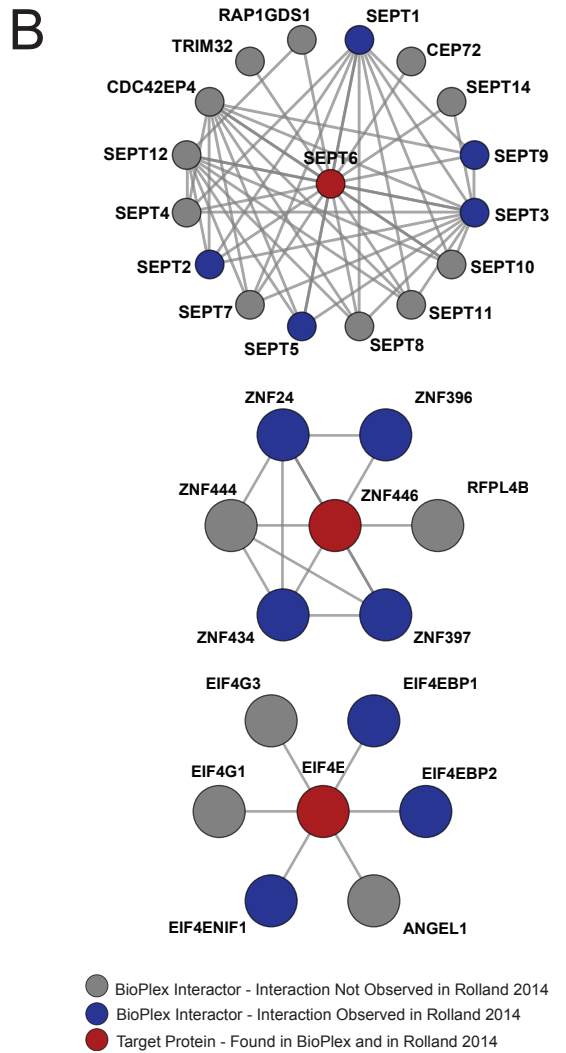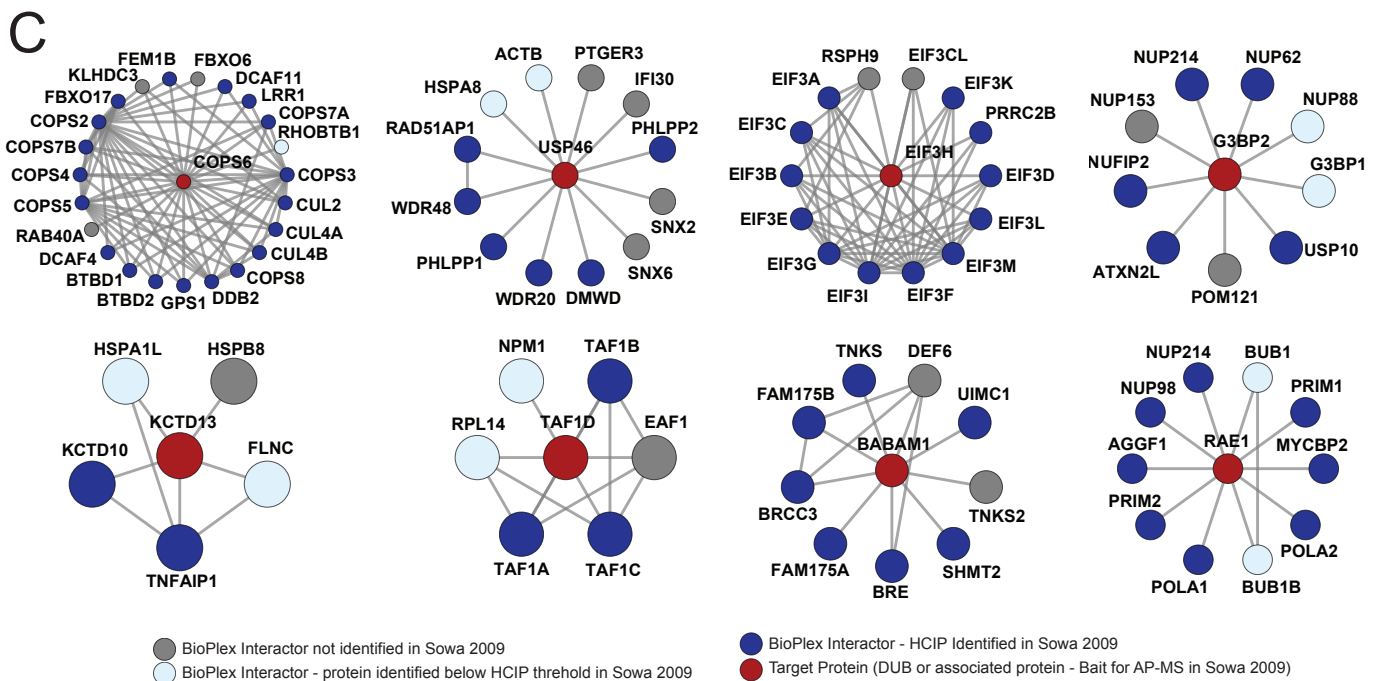

Supplement: NIHMS705373-supplement-1.pdf [file NIHMS705373-supplement-1.pdf]

**A**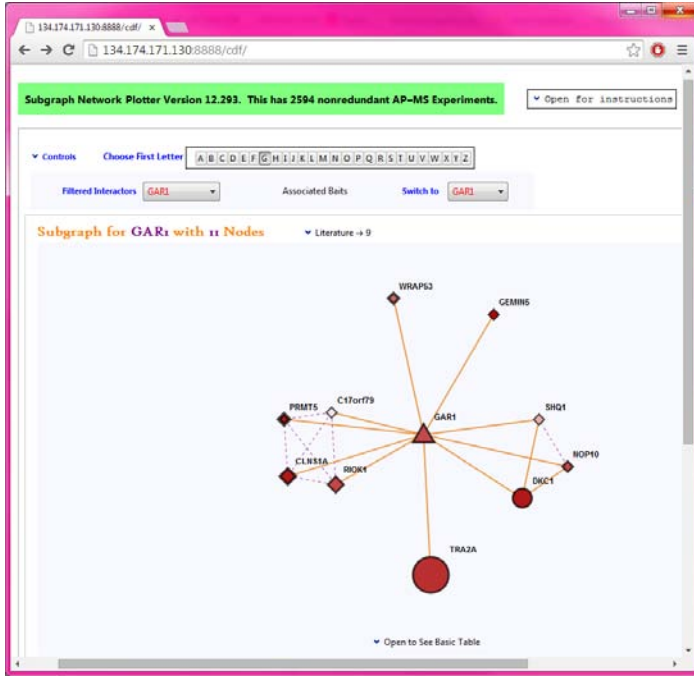**B**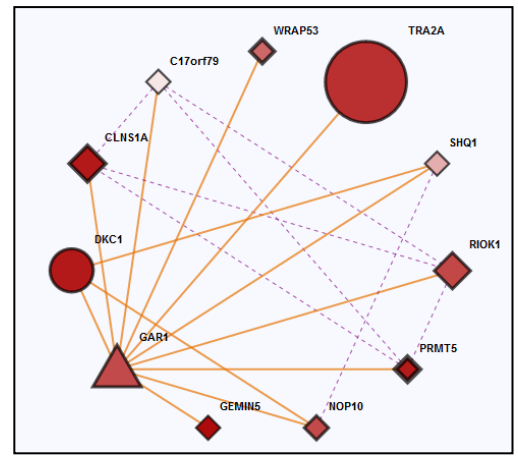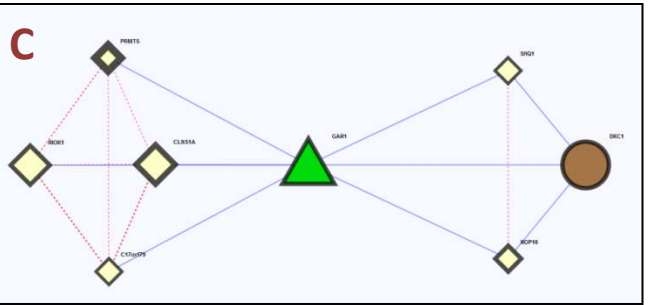**D**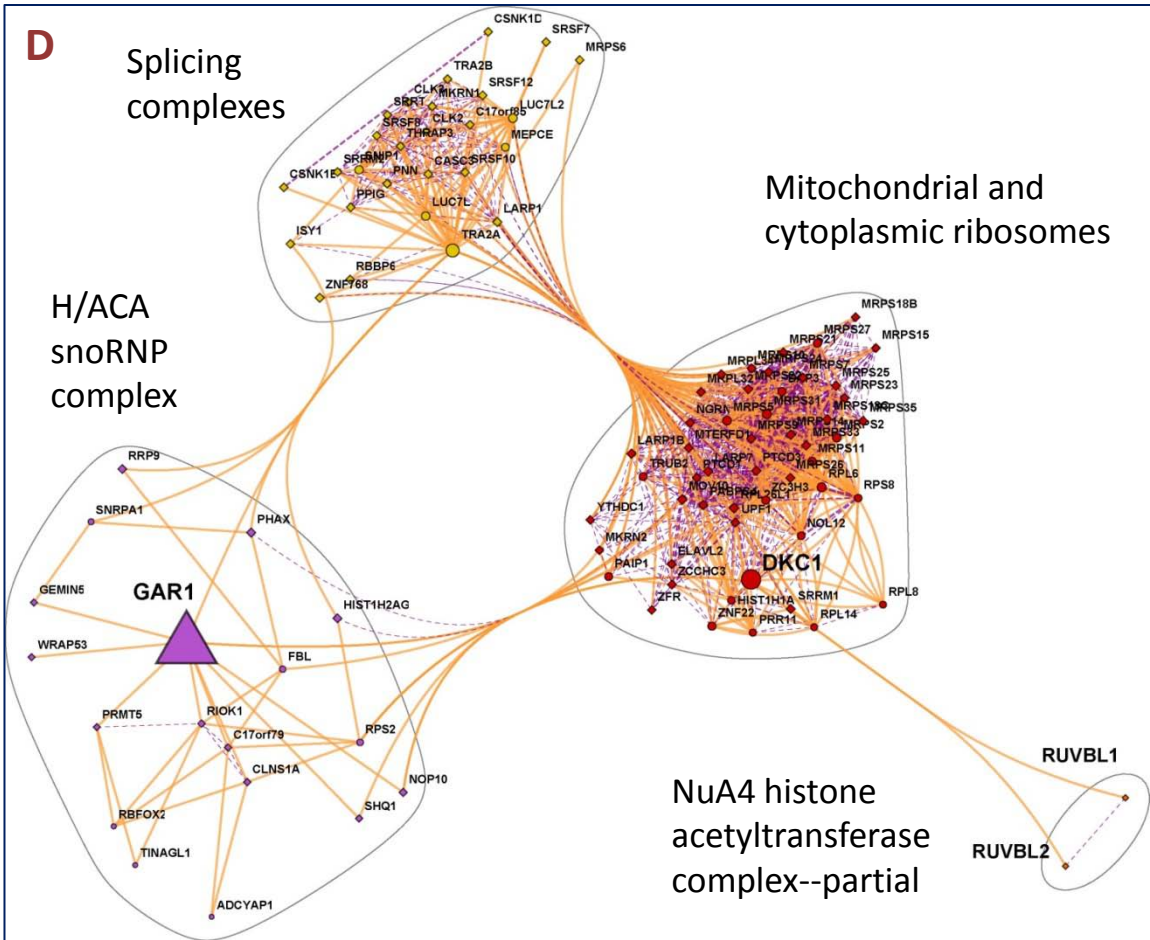

Supplement: NIHMS705373-supplement-3.pdf [file NIHMS705373-supplement-3.pdf]

**A**

← 665 Pfam Domains →

2968 Associated Domain Pairs  
( $p < 0.01$ )

↑ 1126 Pfam Domains ↓

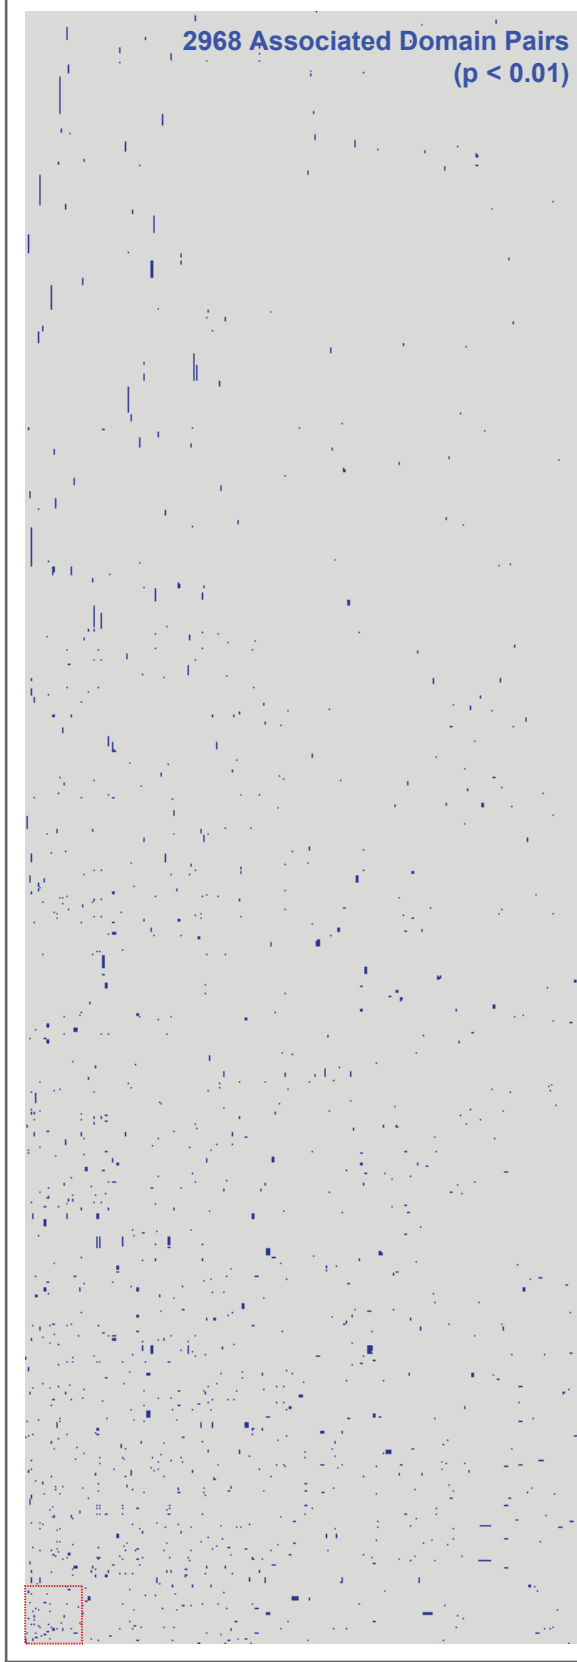**B**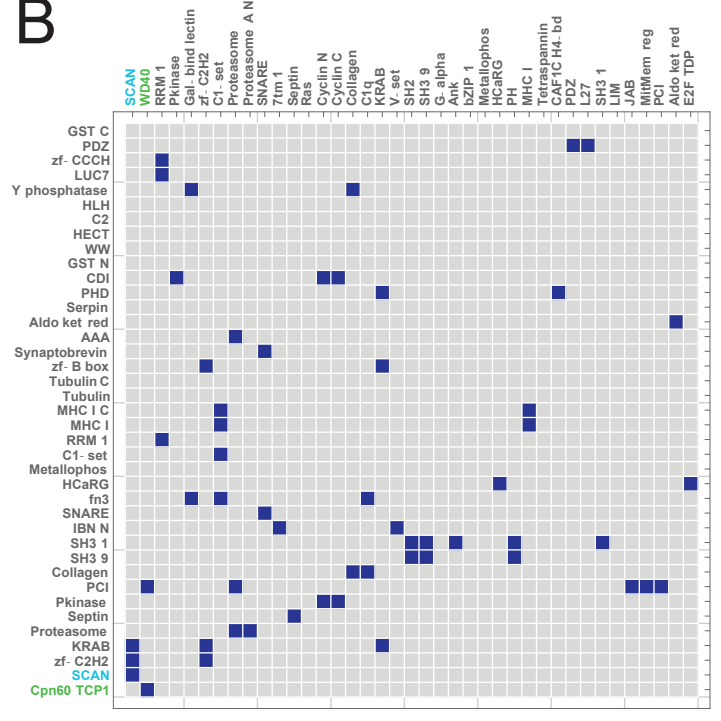**C**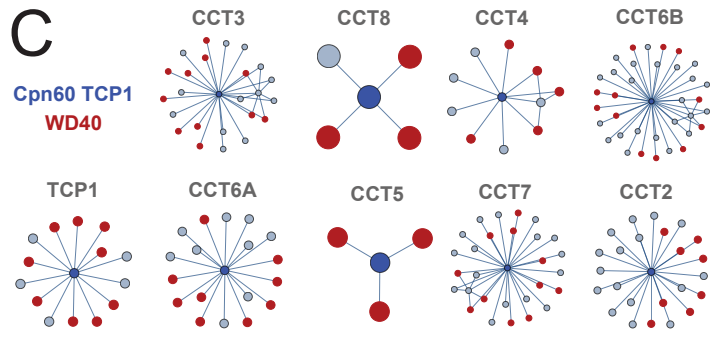**D**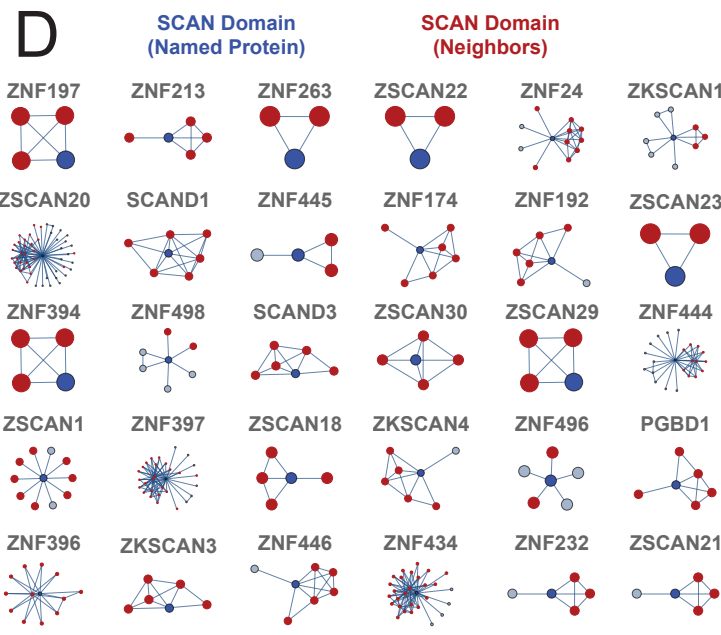

Supplement: NIHMS705373-supplement-6.pdf [file NIHMS705373-supplement-6.pdf]

**A**

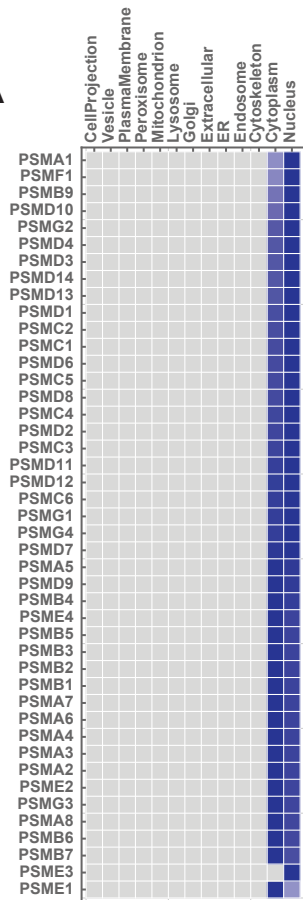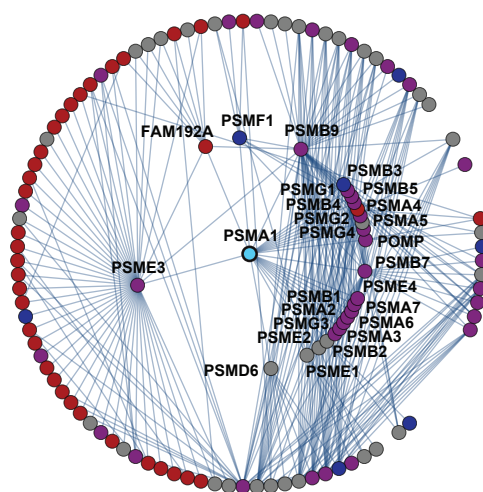

Cytoplasm      Nucleus      Both

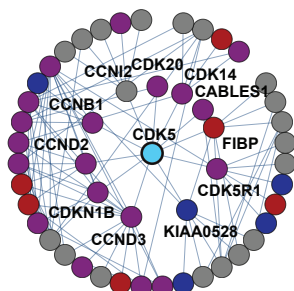

**B**

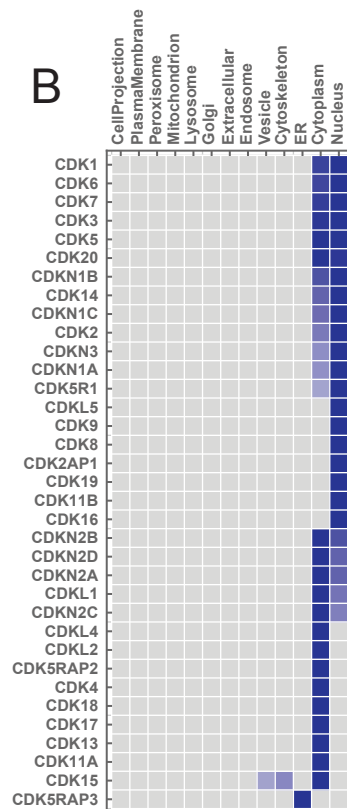

**C**

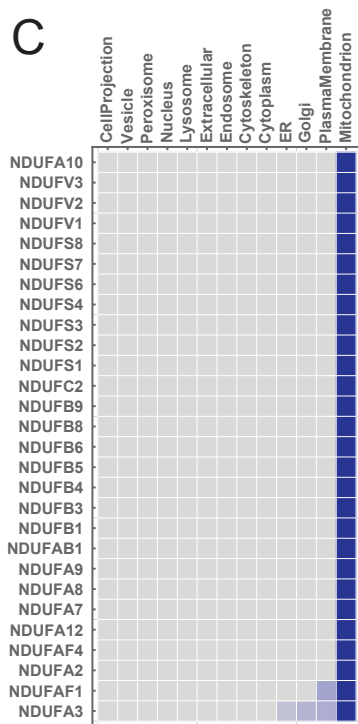

Mitochondrion

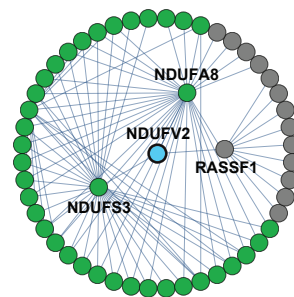

Nucleus

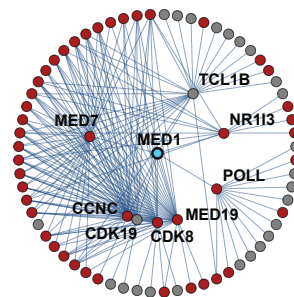

**D**

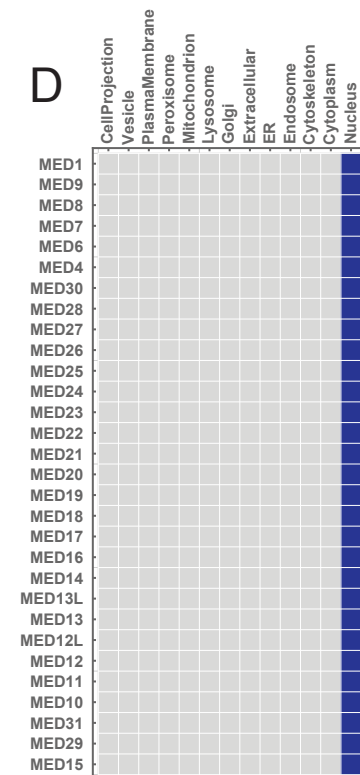

Supplement: NIHMS705373-supplement-7.pdf [file NIHMS705373-supplement-7.pdf]
